# Supplementary material
Source: Springer Nature journal article supplement (https://www.springermedizin.de/resource/supplementary/13026_2008_19_MOESM2_ESM.pdf/9644486)
Supplement: MOESM2 [file 9644486]

**Osteopathic  
Manipulative Treatment**

---

**Active**

**Sham**

**Ultrasound Physical  
Therapy**

**Active**

Group A  
OMT  
UPT  
(n=122)

Group B  
Sham OMT  
UPT  
(n=122)

**Sham**

Group C  
OMT  
Sham UPT  
(n=122)

Group D  
Sham OMT  
Sham UPT  
(n=122)

\*OMT denotes osteopathic manipulative treatment;  
UPT, ultrasound physical therapy.
